# Supplementary material for: Genomewide Analysis of PRC1 and PRC2 Occupancy Identifies Two Classes of Bivalent Domains
Source: PubMed Central journal article supplement (PMC2567431; doi:10.1371/journal.pgen.1000242), 2008-10-31

Figure S1. Comparison of chromatin states in mouse and human ES cells.

**A**

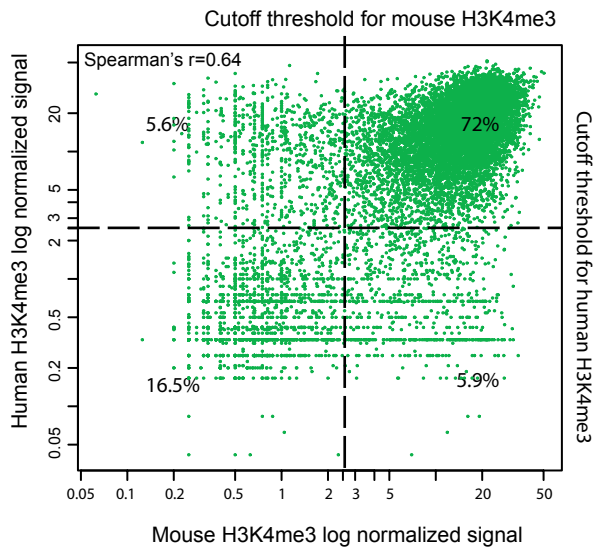

**B**

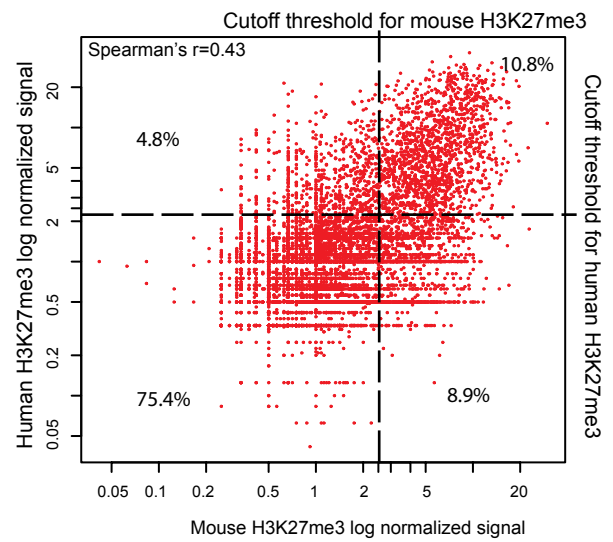

**C**

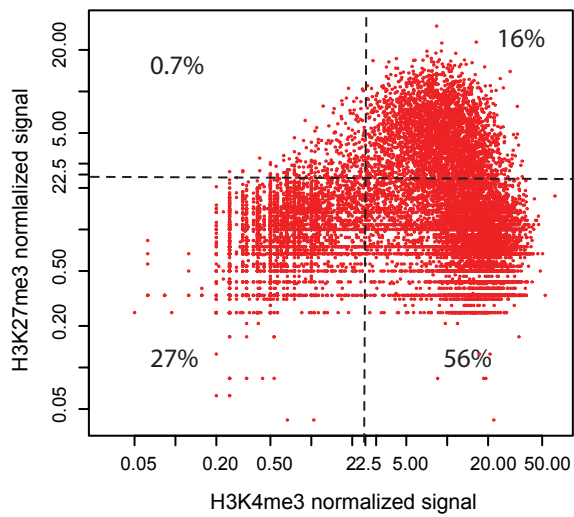

Supplement: pgen.1000242.s001.pdf [file pgen.1000242.s001.pdf]
