# Supplementary material for: Genomewide Analysis of PRC1 and PRC2 Occupancy Identifies Two Classes of Bivalent Domains
Source: PubMed Central journal article supplement (PMC2567431; doi:10.1371/journal.pgen.1000242), 2008-10-31
Supplement: pgen.1000242.s003.pdf [file pgen.1000242.s003.pdf]

Figure S3. Chromatin states of species-specific factors from ES cell Pathways.

| Chromatin States of species-specific factors from ES Cell Pathways |                       |                     |
|--------------------------------------------------------------------|-----------------------|---------------------|
|                                                                    | Mouse ES Cells (v6.5) | Human ES Cells (H9) |
| <b>FGF Signaling</b>                                               |                       |                     |
| FGF2                                                               | Bivalent              | K4                  |
| FGF8                                                               | Bivalent              | Bivalent            |
| FGF12                                                              | Bivalent              | Bivalent            |
| FGFR2                                                              | bivalent              | K4                  |
| FGFR3                                                              | bivalent              | K4                  |
| FGFR4                                                              | bivalent              | K4                  |
| Spry                                                               | K4                    | K4                  |
| <b>Nodal/Activin</b>                                               |                       |                     |
| Nodal                                                              | K4                    | K4                  |
| Lefty2                                                             | Bivalent              | K4                  |
| Lefty1                                                             | Bivalent              | K4                  |
| Inhba                                                              | Bivalent/Bivalent     | Bivalent/K4         |
| Acvr2b                                                             | K4                    | K4                  |
| FSTL1                                                              | K4                    | K4                  |
| <b>Lif/Stat Pathway</b>                                            |                       |                     |
| LifR                                                               | K4                    | K4                  |
| Stat3                                                              | K4                    | K4                  |
| Socs-1                                                             | Bivalent              | K4                  |
| <b>ICM Specific</b>                                                |                       |                     |
| Gbx2                                                               | K4                    | Bivalent            |
| FGF4                                                               | K4                    | Bivalent            |
