# Supplementary material for: Genomewide Analysis of PRC1 and PRC2 Occupancy Identifies Two Classes of Bivalent Domains
Source: PubMed Central journal article supplement (PMC2567431; doi:10.1371/journal.pgen.1000242), 2008-10-31

Figure S4. Expression analysis in PRC2 wild-type (WT) and knock-out (KO) mouse ES cells.

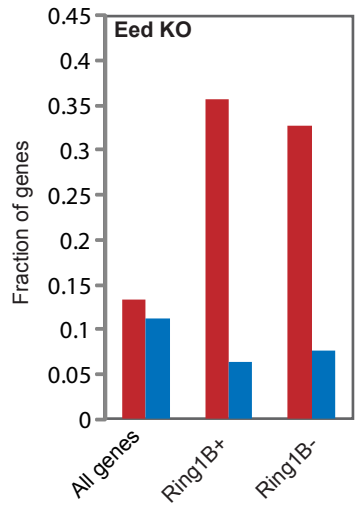

Supplement: pgen.1000242.s004.pdf [file pgen.1000242.s004.pdf]
