# Supplementary material for: Genomewide Analysis of PRC1 and PRC2 Occupancy Identifies Two Classes of Bivalent Domains
Source: PubMed Central journal article supplement (PMC2567431; doi:10.1371/journal.pgen.1000242), 2008-10-31

Figure S5. Analysis of the CG-richness of HMM-defined intervals of H3K4me3, H3K27me3, H3K36me3, H3K9me3, H3K20me3, and Ezh2.

**A**

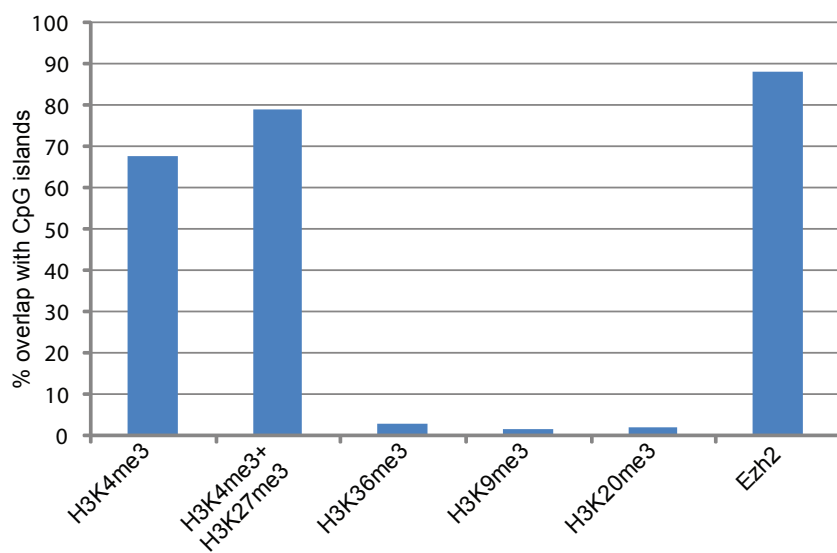

**B**

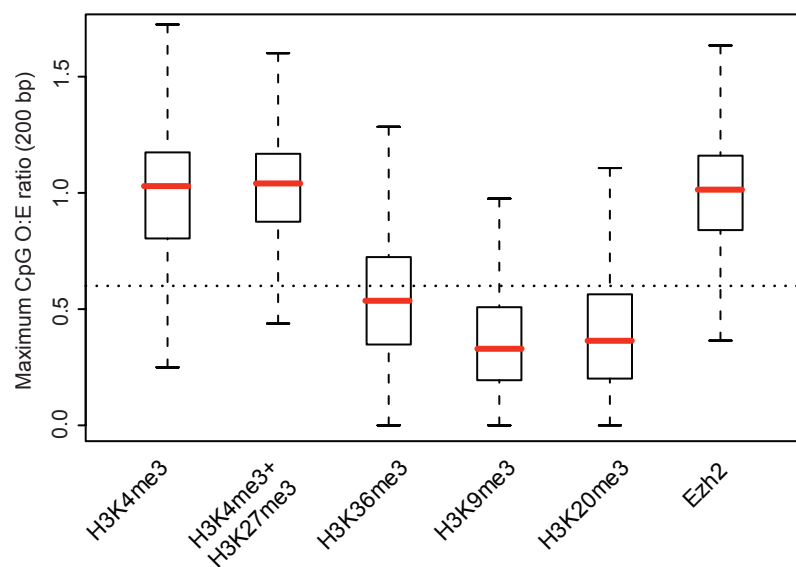

Supplement: pgen.1000242.s005.pdf [file pgen.1000242.s005.pdf]
