# Supplementary material for: Genomewide Analysis of PRC1 and PRC2 Occupancy Identifies Two Classes of Bivalent Domains
Source: PubMed Central journal article supplement (PMC2567431; doi:10.1371/journal.pgen.1000242), 2008-10-31

Figure S7. Conservation of Ezh2-bound and Ezh2-unbound dinucleotides between rat and mouse.

**A**

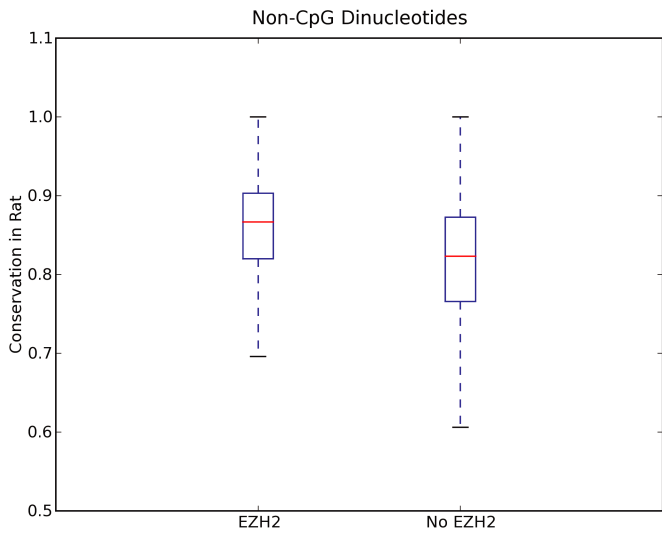

**B**

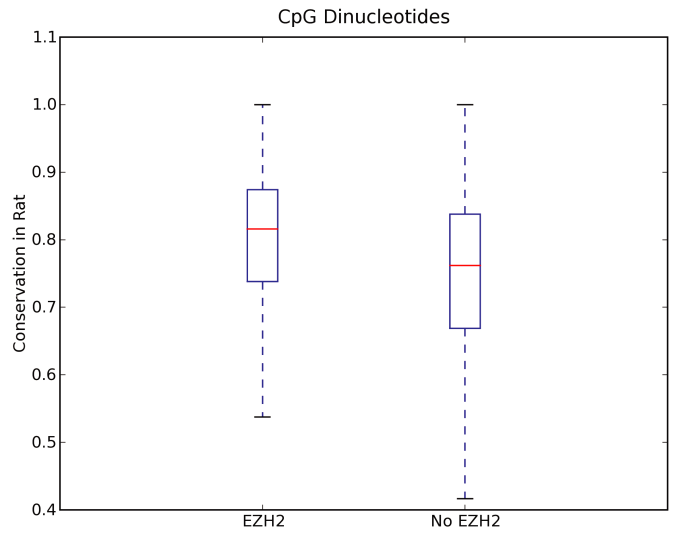

Supplement: pgen.1000242.s007.pdf [file pgen.1000242.s007.pdf]
