# Supplementary material for: Genomewide Analysis of PRC1 and PRC2 Occupancy Identifies Two Classes of Bivalent Domains
Source: PubMed Central journal article supplement (PMC2567431; doi:10.1371/journal.pgen.1000242), 2008-10-31

Figure S8. Motif clusters and their respective enrichment p-values for Ezh2-positive and Ezh2-negative CpG islands.

**A**

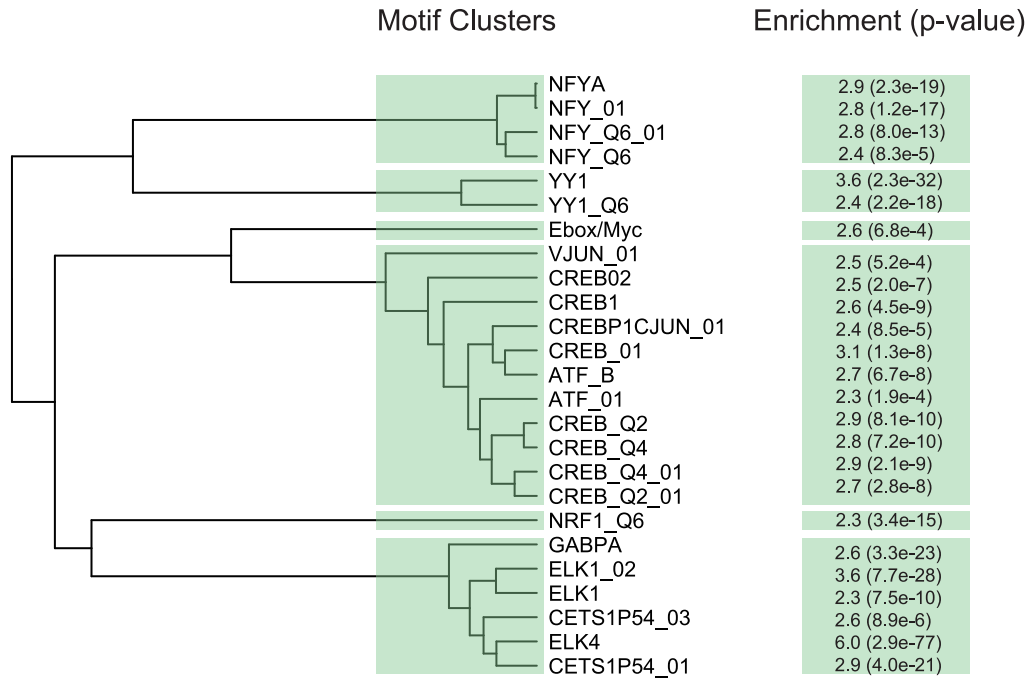

**B**

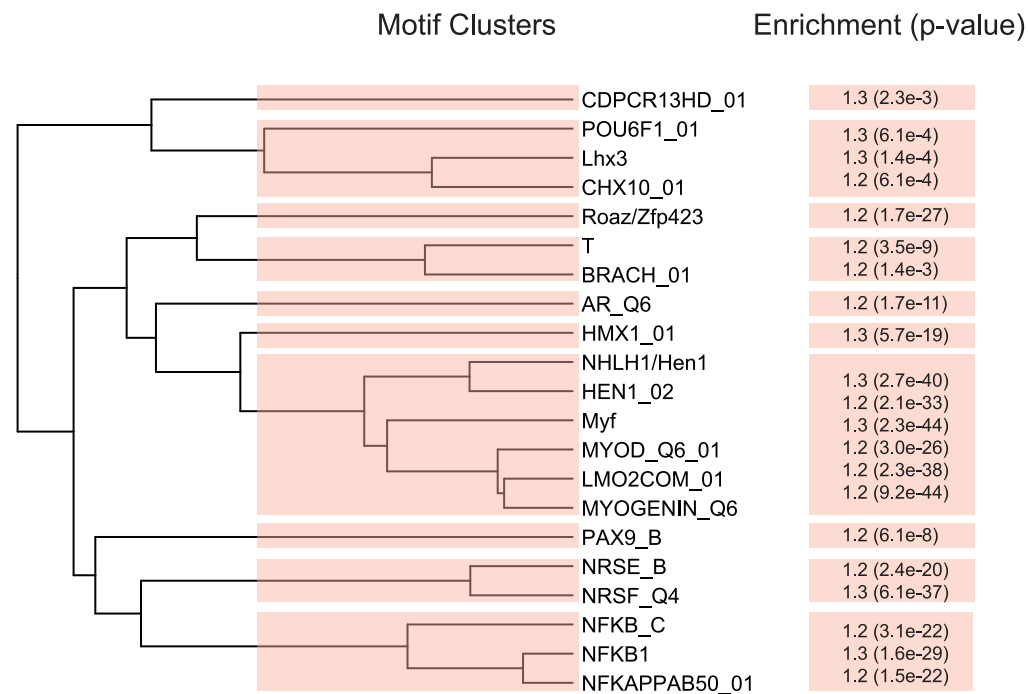

Supplement: pgen.1000242.s008.pdf [file pgen.1000242.s008.pdf]
