# Supplementary material for: Genomewide Analysis of PRC1 and PRC2 Occupancy Identifies Two Classes of Bivalent Domains
Source: PubMed Central journal article supplement (PMC2567431; doi:10.1371/journal.pgen.1000242), 2008-10-31

Figure S9. Length of CpG islands in Ring1B-positive and Ring1B-negative bivalent promoters.

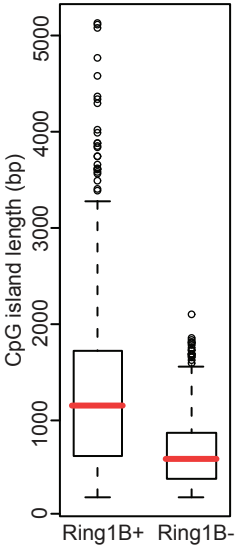

Supplement: pgen.1000242.s009.pdf [file pgen.1000242.s009.pdf]
