# Supplementary material for: Genomewide Analysis of PRC1 and PRC2 Occupancy Identifies Two Classes of Bivalent Domains
Source: PubMed Central journal article supplement (PMC2567431; doi:10.1371/journal.pgen.1000242), 2008-10-31
Supplement: pgen.1000242.s010.pdf [file pgen.1000242.s010.pdf]

Table S1. List of ChIP-Seq datasets showing numbers of aligned reads.

| <b>Cell Type<sup>1</sup></b> | <b>Epitope</b> | <b># Aligned Reads</b> |
|------------------------------|----------------|------------------------|
| mES cells                    | Ezh2           | 7006533                |
|                              | Suz12          | 8413470                |
|                              | Ring1B         | 3482313                |
| hES cells                    | H3K4me3        | 7644200                |
|                              | H3K27me3       | 6572966                |
|                              | H3K36me3       | 7630514                |
|                              | EZH2           | 11114357               |
|                              | RING1B         | 1607409                |

<sup>1</sup>mES cells are from genotype 129SVJae x C57BL/6 F1 mice; hES cells are H9.
