# Supplementary material for: Genomewide Analysis of PRC1 and PRC2 Occupancy Identifies Two Classes of Bivalent Domains
Source: PubMed Central journal article supplement (PMC2567431; doi:10.1371/journal.pgen.1000242), 2008-10-31
Supplement: pgen.1000242.s014.pdf [file pgen.1000242.s014.pdf]

Table S5. PCR primers used for Ezh2, Ring1B and Flag-Bmi1 ChIP-qPCR in mouse ES cells.

| <b>Gene Name</b>       | <b>Forward</b>         | <b>Reverse</b>           |
|------------------------|------------------------|--------------------------|
| <b>Acat1</b>           | CTCCTGGGCCTACAGAGAGA   | CGTGTGTCAGTCCACCTGTC     |
| <b>Adssl1</b>          | CCTCCAGATTAACGGCAAAG   | AGGACTAGGGTTTGGGGTTG     |
| <b>Bmp2</b>            | CCGATCACCTCTCTTCCTCA   | CTGGGCTTCTGTTGCTTTTC     |
| <b>Cck</b>             | AGACATACGCCGCTCTTCAT   | ACTTCTGTGTGCGGGACTTT     |
| <b>Cnnm1</b>           | TGCTTGACTTCGCCACTGTA   | AAAGGCCAAGTCTTTGACGA     |
| <b>Fgfr4</b>           | GGGTGGGGGCATTAAAGTAA   | GTTGTTCAACCCTCCTGCACT    |
| <b>Foxb2</b>           | AGTGGCACAGAGCCTTGACT   | CATGTTGGCGTGATGGATT      |
| <b>Foxi2</b>           | CTTCTACAAGCGCAGCAAGG   | TGTGCTGCTGTTTACCTGGA     |
| <b>Gapdh</b>           | AGCATCCCTAGACCCGTACAGT | GGGTTCCCTATAAATACGGACTGC |
| <b>Gpr103</b>          | GCAGATCACTGAGTGCCAGA   | CTGGCTGGAGCACTCATTTC     |
| <b>Ihh</b>             | GCTGGGCTGTGAGAAATGTT   | CTGGCAGCTCAGGTCAAATC     |
| <b>Lef1</b>            | ATCAGTCATCCCGAAGAGGA   | AGCTGCCCACTCACCTCAT      |
| <b>Pou5f1</b>          | CAAGTTGGCGTGGAGACTTT   | TTGGTTCCACCTTCTCCAAC     |
| <b>Pax7</b>            | TGTTTTGCTTGCAATTCGTTT  | CGAATTAGACAGAGGCGAAGA    |
| <b>Pde1c</b>           | CAAAGCCAAAGAAGCTACCG   | GCTGCTCAGGCTCATCCTAC     |
| <b>Six1</b>            | GAGCGAAGGGTGAACTTCC    | TTAAGAACCGGAGGCAAAGA     |
| <b>Snai1</b>           | CACCCTCATCTGGGACTCTC   | GAGCTTTTGCCACTGTCTCTC    |
| <b>St8sia4</b>         | CCGTAGCAGGGAAACGATAA   | ACCGAGCTCACAACGACTCT     |
| <b>Tgm2</b>            | TCCACTCTTCTCAGCCCTGT   | TGTTCTCCAAGCCCAGATTC     |
| <b>Tnip2</b>           | CCCTCATAACCCAGCTCCTT   | GTCGCGAGGATATGAAGCTC     |
| <b>Zyx</b>             | CGCTTAGACCGAGGAGTGTC   | GAGACGGAGACGGAGATCG      |
| <b>Genomic control</b> | ATTTTGTGCTGCATAACCTCCT | TAGCAACATCCTAAGCTGGACA   |
