# Supplementary material for: Genomewide Analysis of PRC1 and PRC2 Occupancy Identifies Two Classes of Bivalent Domains
Source: PubMed Central journal article supplement (PMC2567431; doi:10.1371/journal.pgen.1000242), 2008-10-31
Supplement: pgen.1000242.s015.pdf [file pgen.1000242.s015.pdf]

## Text S1 Supporting information on the specificity of antibodies

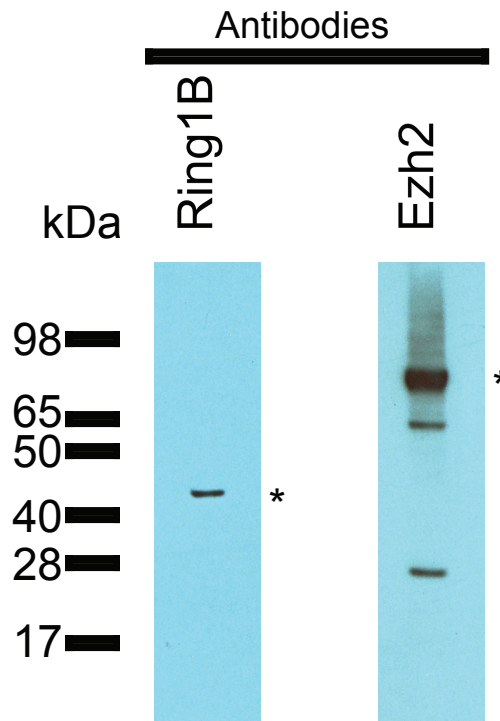

Western blots using mouse ES cell protein extracts demonstrate the specificity of anti-Ring1B (see below) and anti-Ezh2 (Active Motif 39103), antibodies used in this study. \*indicates the expected molecular weight. Previous publications that demonstrate the specificity of the antibodies used are listed below.

Anti-H3K4me3 (Abcam ab8580):

Santos-Rosa H, Schneider R, Bannister AJ, Sherriff J, Bernstein BE, Emre NC, Schreiber SL, Mellor J, Kouzarides T. Active genes are trimethylated at K4 of histone H3. *Nature* 419:407-11 (2002).

Anti-H3K27me3 (Upstate 07-449):

Peters AH, Kubicek S, Mechtler K, O'sullivan RJ, Derijck AA, Perez-Burgos L, Kohlmaier A, Opravil S, Tachibana M, Shinkai Y, Martens JH, Jenuwein T. Partitioning and plasticity of repressive histone methylation states in mammalian chromatin. *Mol Cell*. Dec;12(6): 1577-89. (2003).

Anti-H3K36me3 (Abcam ab9050):

Lee MG, Norman J, Shilatifard A, Shiekhattar R. Physical and Functional Association of a Trimethyl H3K4 Demethylase and Ring6a/MBLR, a Polycomb-like Protein. *Cell* 128: 877-87 (2007).

Anti-Suz12 (Abcam ab12073):

Pasini D, Hansen KH, Christensen J, Agger K, Cloos PA, Helin K. Coordinated regulation of transcriptional repression by the RBP2 H3K4 demethylase and Polycomb-Repressive Complex 2. *Genes Dev* 22:1345-55 (2008).

Anti-Ring1B:

Atsuta T, Fujimura S, Moriya H, Vidal M, Akasaka T, Koseki H. Production of monoclonal antibodies against mammalian Ring1B proteins. *Hybridoma* 20:43-46. (2001).
